# Supplementary material for: Gas-phase anion exchange towards ZnO/ZnSe heterostructures with intensive visible light emission
Source: Royal Society of Chemistry journal article supplement (doi:10.1039/c3tc32312a), 2014-01-01
Supplement: c3tc32312a1.pdf [file c3tc32312a1.pdf]

Supporting information for

# Gas-Phase Anion Exchange towards ZnO/ZnSe Coaxial Nanorods with Intensive Visible Light Emission

Yan Wang<sup>a</sup>, Tao Ling<sup>a</sup>, Cheng-Chun Tang<sup>b</sup>, Shun-Yi Zhi<sup>c</sup>, and Xi-Wen Du<sup>a,\*</sup>

<sup>a</sup> Tianjin Key Laboratory of Composite and Functional Materials, School of Materials Science and Engineering, Tianjin University, Tianjin 300072, P. R. China

<sup>b</sup> School of Material Science and Engineering, Hebei University of Technology, Tianjin 300130, China

<sup>c</sup> Department of Physics & Materials Science, City University of Hong Kong 83 Tat Chee Avenue Kowloon, Hong Kong SAR, China

\*Author to whom any correspondence should be addressed.

E-mail: xwdu@tju.edu.cn

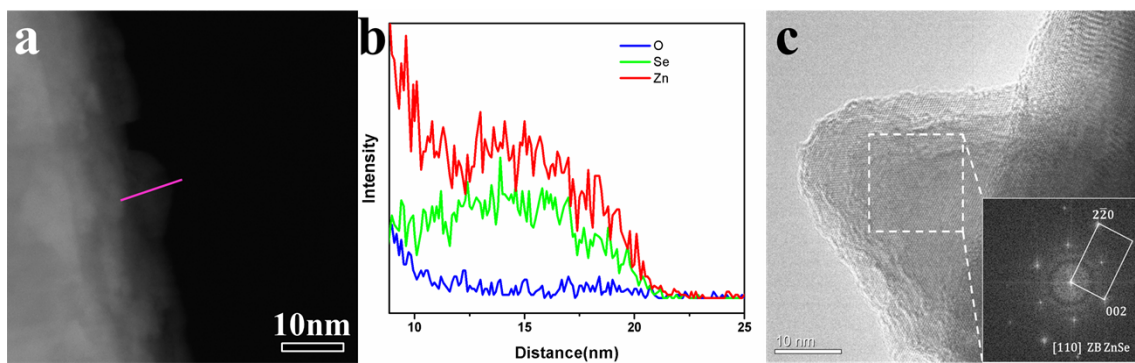

**Figure S1** (a) Scanning transmission electron microscope (STEM) image of nanoparticles formed on a ZnO nanorod after being heated to 600 °C without holding temperature. (b) Elemental linescan analysis across a nanoparticle along the line shown in (a); (c) HRTEM image of a nanoparticle on the ZnO/ZnSe nanorod, the inset is a FFT pattern corresponding to the area in the white frame.

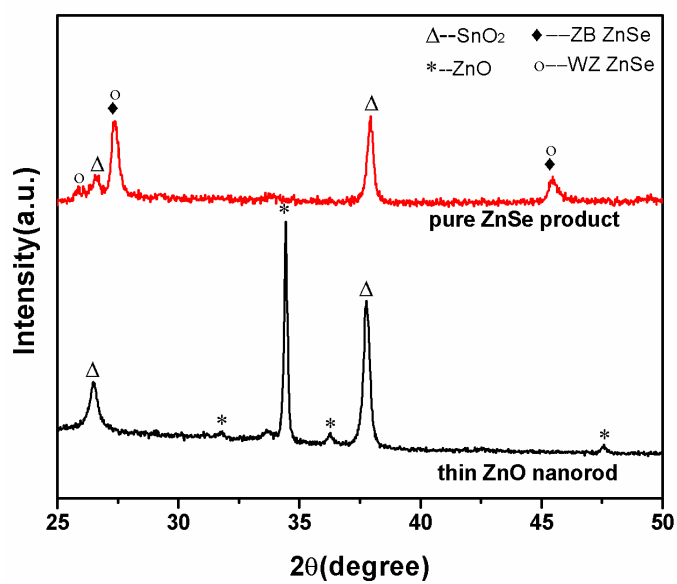

**Figure S2** XRD patterns of the thin ZnO nanorods before anion exchange and corresponding pure ZnSe nanorods after anion exchange.

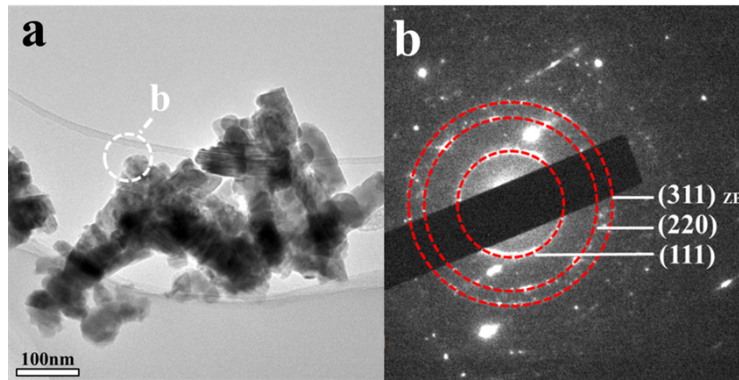

**Figure S3** (a) TEM image of the selenylation product by using thin ZnO nanorods as template; (b) SAED pattern of the agglomerated particles marked in (a).

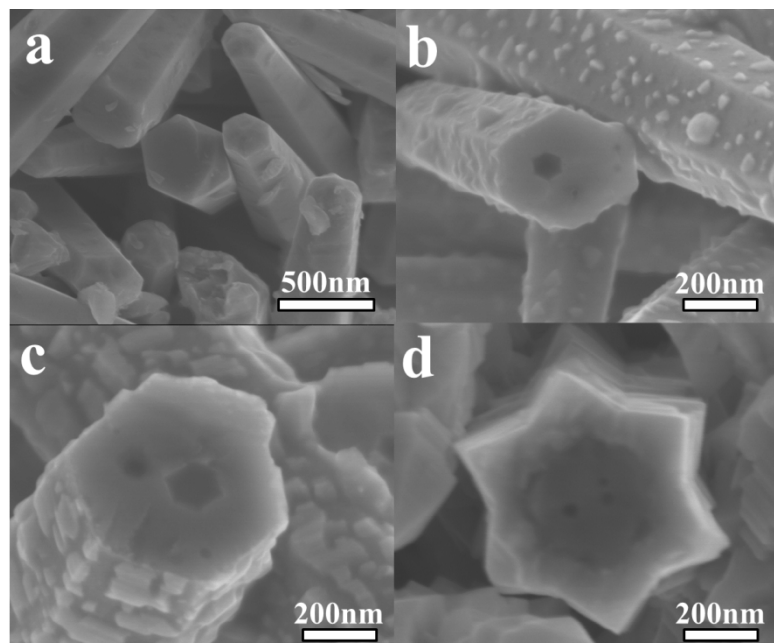

**Figure S4** Cross-sectional SEM images of (a) raw ZnO nanorod; (b) the sample heated to 600 °C without holding temperature; (c) the sample being kept temperature at 600 °C for 10 min; (d) the sample being kept temperature at 600 °C for 60 min.

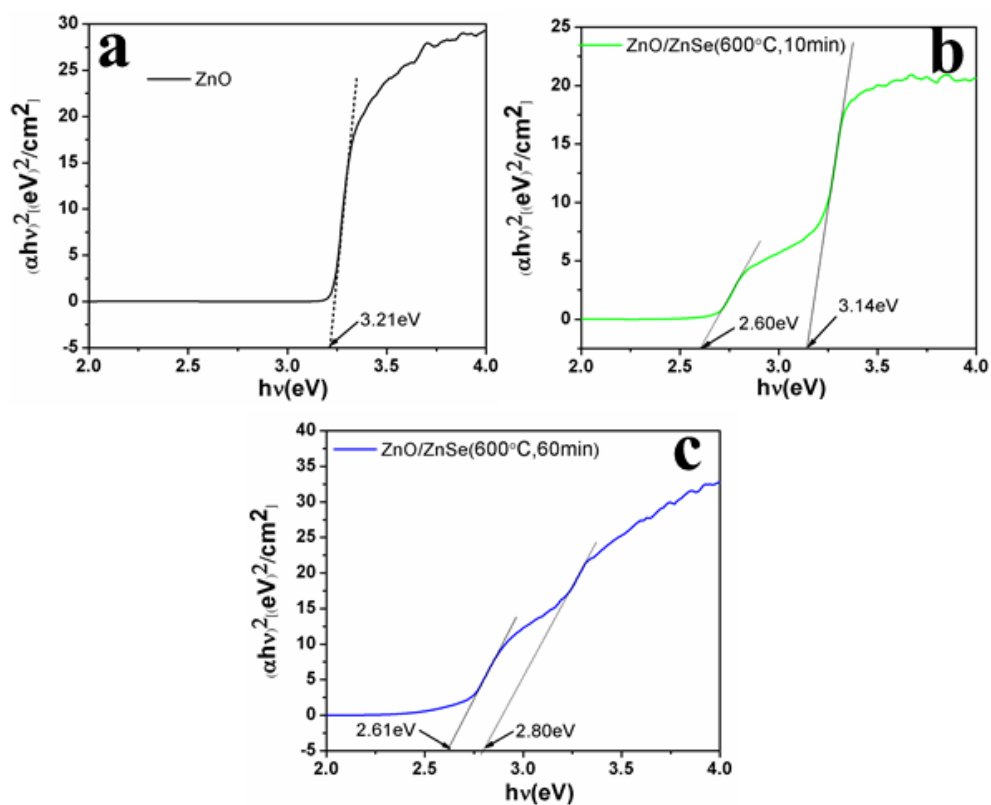

**Figure S5** The  $(\alpha h\nu)^2$ - $h\nu$  plot of the absorption spectra shown in Figure 5a. (a) pure ZnO nanorods, (b) ZnO/ZnSe nanorods after 10 min anion exchange, (c) ZnO/ZnSe nanorods after 60 min anion exchange.

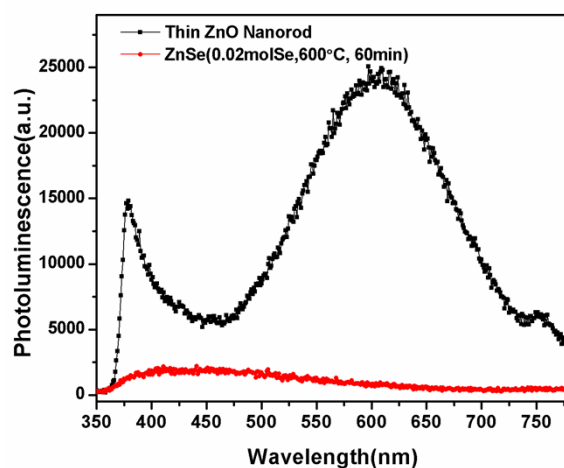

**Figure S6** PL spectra of the raw thin ZnO nanorods and product after selenization. The PL spectra were acquired at an excitation wavelength of 325 nm.
